# Supplementary material for: Genomic Analysis Unravels Reduced Inorganic Sulfur Compound Oxidation of Heterotrophic AcidophilicAcidicaldussp. Strain DX-1
Source: Hindawi journal article supplement (doi:10.1155/2016/8137012), 2016-01-01
Supplement: f1 [file 8137012.f1.pdf]

| Gene         | Product                                                   | EC no.              |
|--------------|-----------------------------------------------------------|---------------------|
| <i>hdrA</i>  | heterodisulfide reductase subunit A                       | EC:1.8.98.1         |
| <i>hdrB</i>  | heterodisulfide reductase subunit B                       | EC:1.8.98.1         |
| <i>hdrC</i>  | heterodisulfide reductase subunit C                       | EC:1.8.98.1         |
| <i>dsrE</i>  | conserved hypothetical protein                            |                     |
| <i>hdrB2</i> | heterodisulfide reductase subunit B                       | EC:1.8.98.1         |
| <i>rhd</i>   | rhodanese; thiosulfate sulfurtransferase                  | EC:2.8.1.1          |
| <i>doxD</i>  | thiosulfate: quinone oxidoreductase                       | EC:1.8.5.2          |
| <i>sat2</i>  | sulfate adenyltransferase subunit 2                       | EC:2.7.7.4          |
| <i>sat1</i>  | sulfate adenyltransferase subunit 1 /adenylsulfate kinase | EC:2.7.7.4 2.7.1.25 |
| <i>sqr</i>   | sulfide quinone reductase                                 | EC:1.8.5.-          |
| <i>sqr2</i>  | sulfide quinone reductase, putative                       | EC:1.8.5.-          |

| <b>Ngar Locus</b>    | <b>start</b> | <b>end</b> | <b>AA Length</b> | <b>Best BLAST hits in GenBank database</b>       |
|----------------------|--------------|------------|------------------|--------------------------------------------------|
| Scaffold_254_gene_1  | 1            | 941        | 313.333333       | <i>Hyphomicrobium denitrificans</i> ATCC 51888   |
| Scaffold_254_gene_2  | 827          | 2329       | 501              | <i>Rhodobacter</i> sp. SW2                       |
| Scaffold_254_gene_3  | 2500         | 3246       | 249              | <i>Rhodobacter</i> sp. SW2                       |
| Scaffold_254_gene_4  | 3322         | 3702       | 145              | <i>Rhodobacter</i> sp. SW2                       |
| Scaffold_9_gene_24   | 22130        | 22789      | 220              | <i>Rhodobacter</i> sp. SW2                       |
| Scaffold_153_gene_17 | 15215        | 15748      | 178              | <i>Leptothrix cholodnii</i> SP-6                 |
| Scaffold_68_gene_12  | 9599         | 10600      | 334              | <i>Gluconobacter oxydans</i> 621H                |
| Scaffold_217_gene_17 | 14921        | 15718      | 266              | <i>Gluconacetobacter diazotrophicus</i> PAI 5    |
| Scaffold_217_gene_18 | 16045        | 16563      | 173              | <i>Acetobacter aceti</i> NBRC 14818              |
| Scaffold_18_gene_12  | 14834        | 16117      | 428              | <i>Bradyrhizobium</i> sp. STM 3809               |
| Scaffold_92_gene_5   | 4297         | 5430       | 378              | <i>Acidithiobacillus ferrooxidans</i> ATCC 53993 |
